# Supplementary material for: Lessons from the 2018–2019 European droughts: a collective need for unifying drought risk management
Source: Copernicus journal article supplement (doi:10.5194/nhess-22-2201-2022), 2022-06-29
Supplement: Supplementary file 1 [file nhess-22-2201-2022-supplement.pdf]

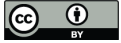

*Supplement of*

## **Lessons from the 2018–2019 European droughts: a collective need for unifying drought risk management**

**Veit Blauhut et al.**

*Correspondence to:* Veit Blauhut ([veit.blauhut@hydrology.uni-freiburg.de](mailto:veit.blauhut@hydrology.uni-freiburg.de))

The copyright of individual parts of the supplement might differ from the article licence.

## Supplements

### **Introduction**

The tables and figures displayed in the main body present a synthesis and insights from the pan-European comparison of the hydro-climatic analysis and survey responses. Here, more detailed aspects of the hydroclimatic situation from 2018 to 2019 are presented in Fig. S1, and individual country-specific responses of the pan-European questionnaire are shown in Figs. S2-S6. The questionnaire as distributed to the participants (in English) is in Table S1. Table S 2 presents the number and share of participants by affiliation and country.

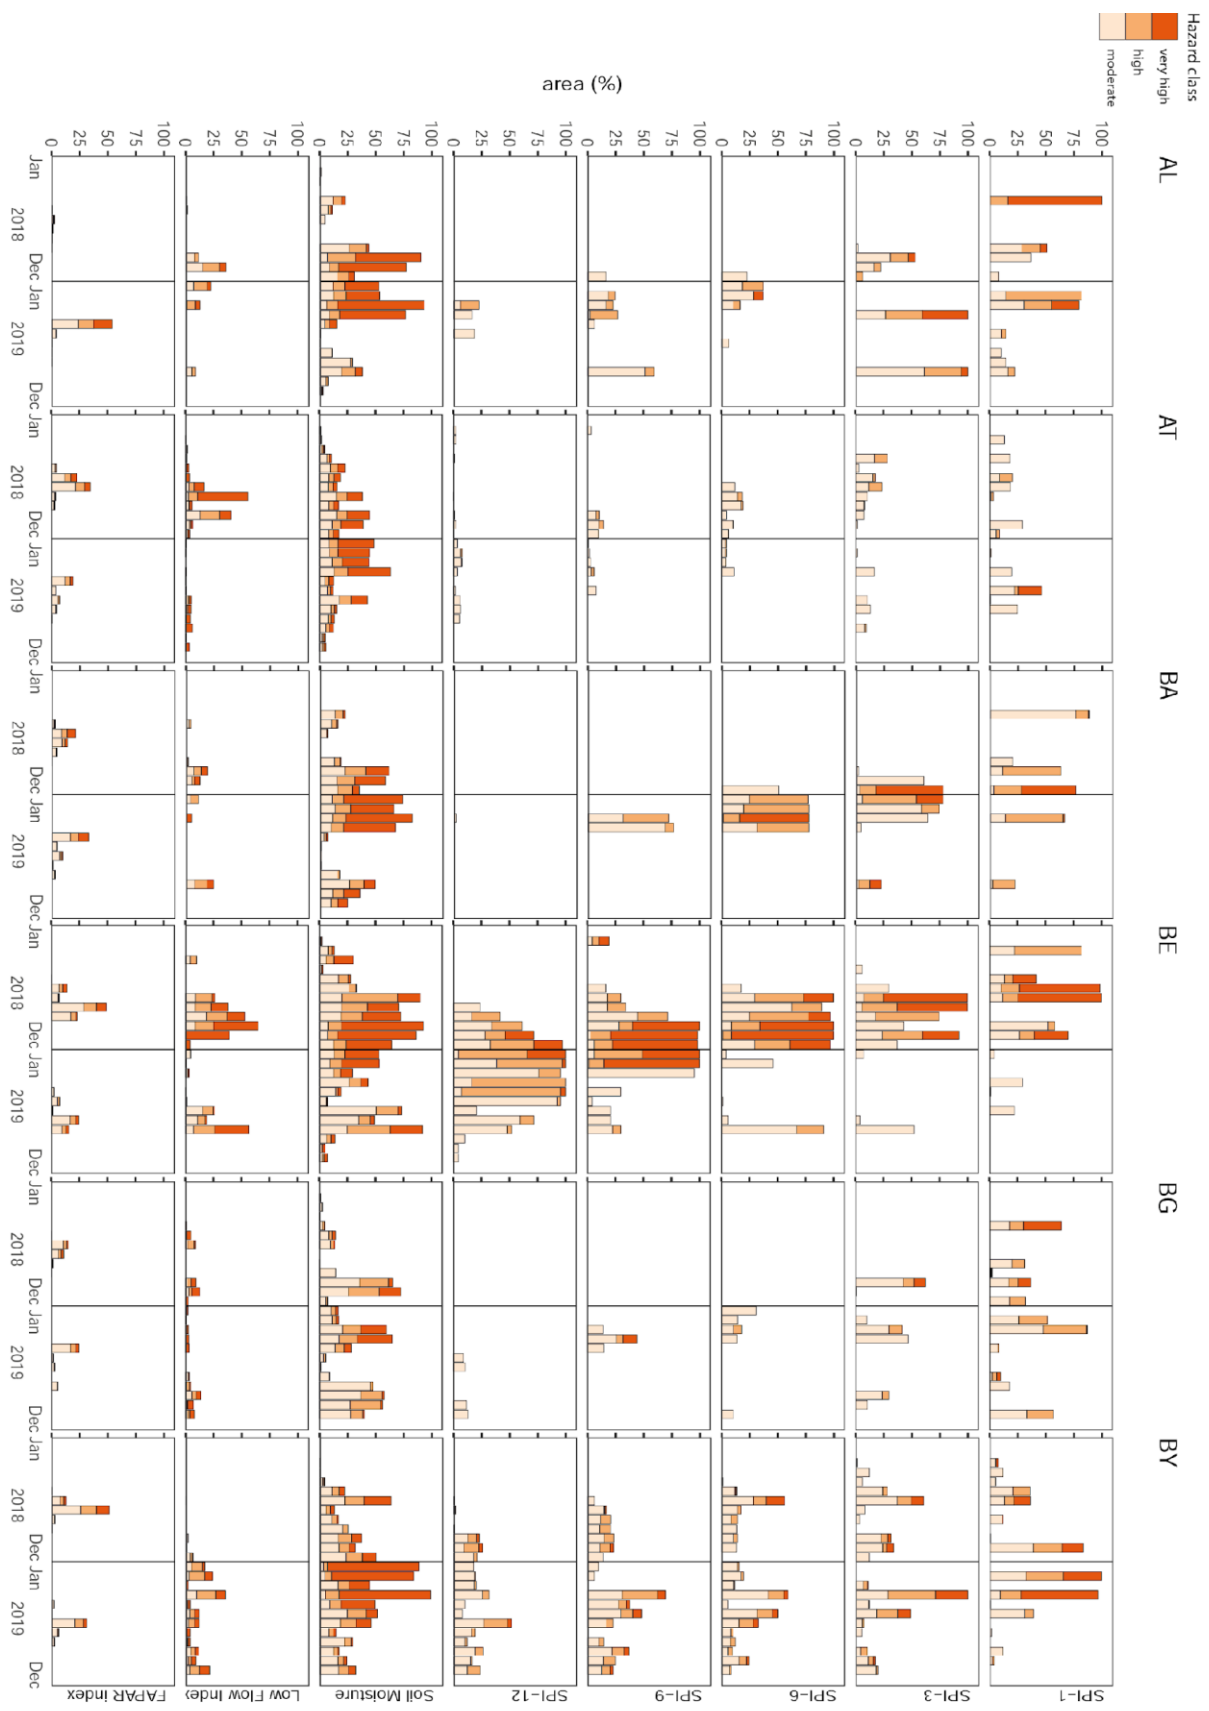

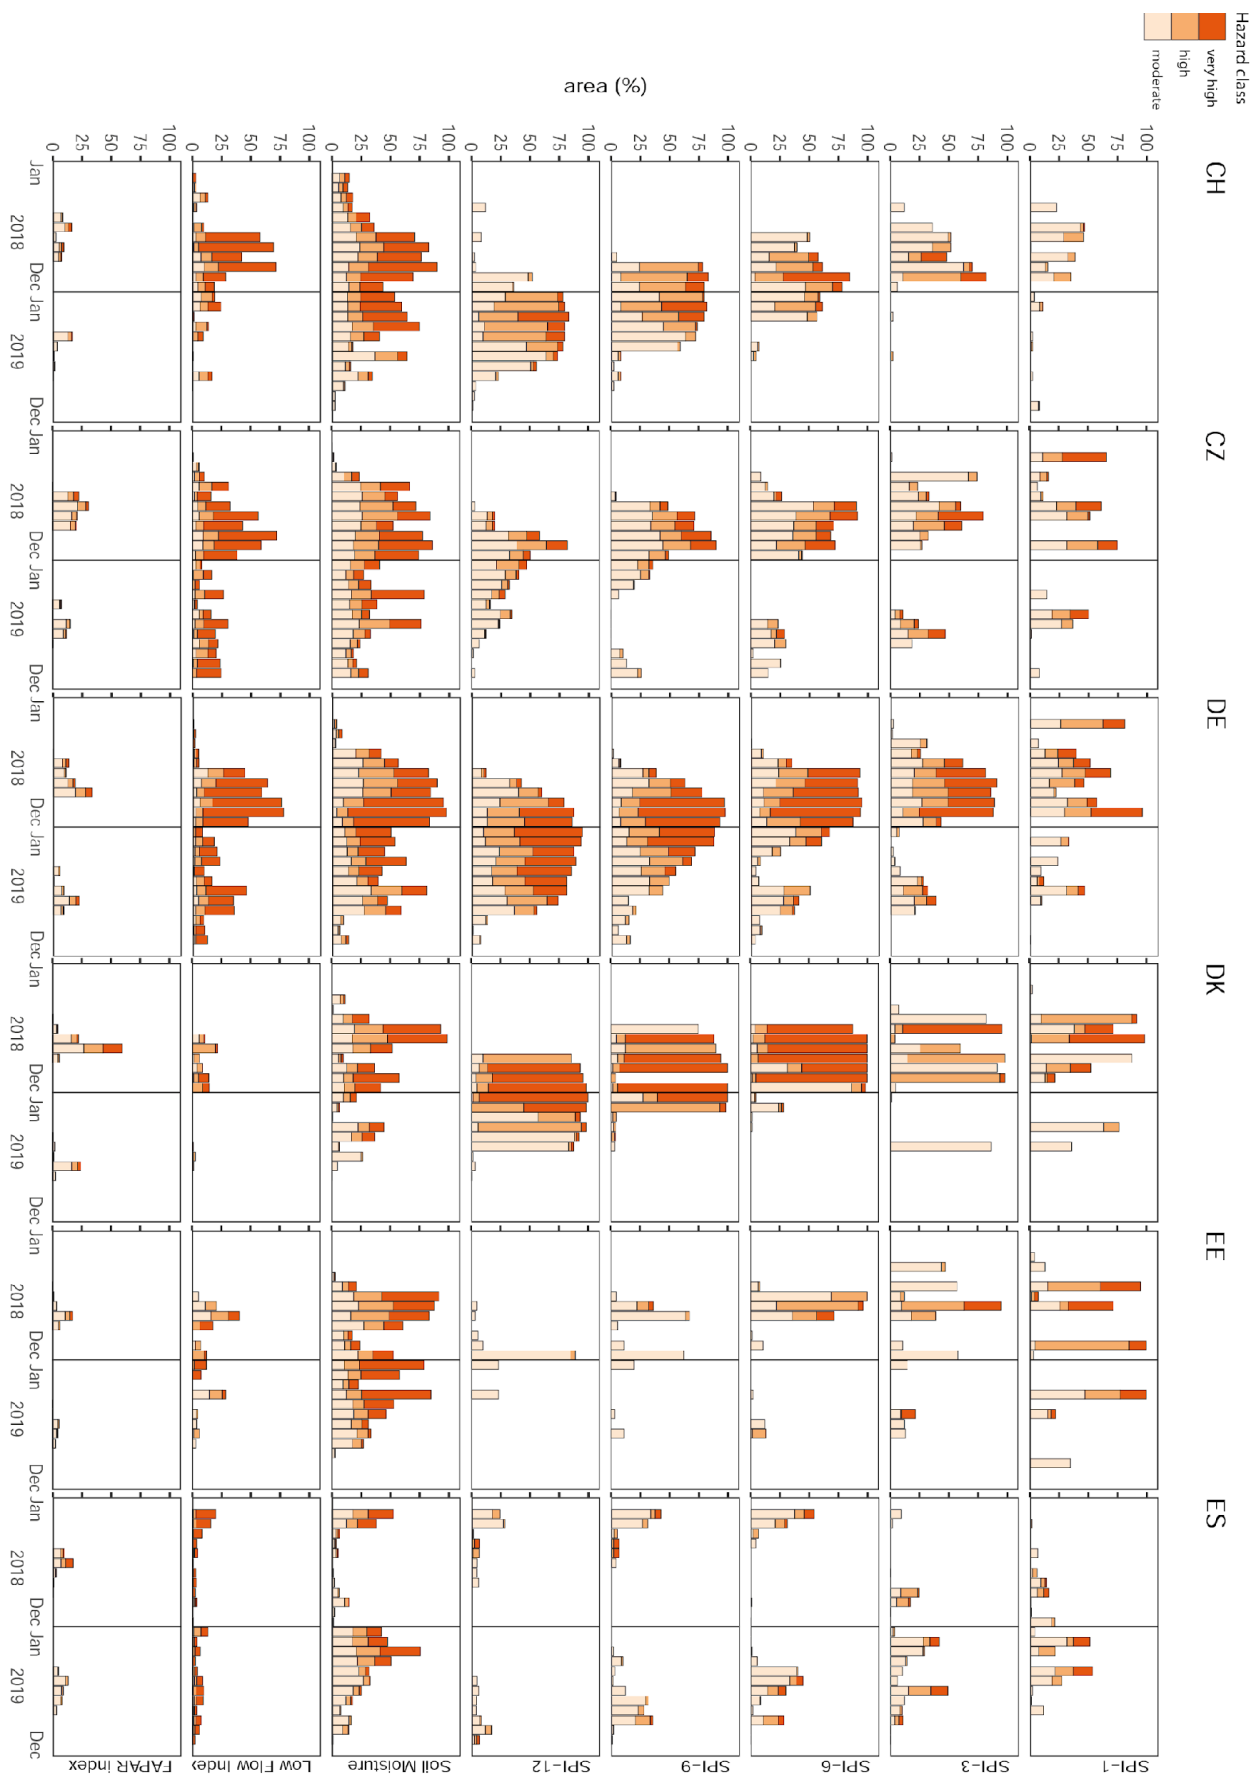

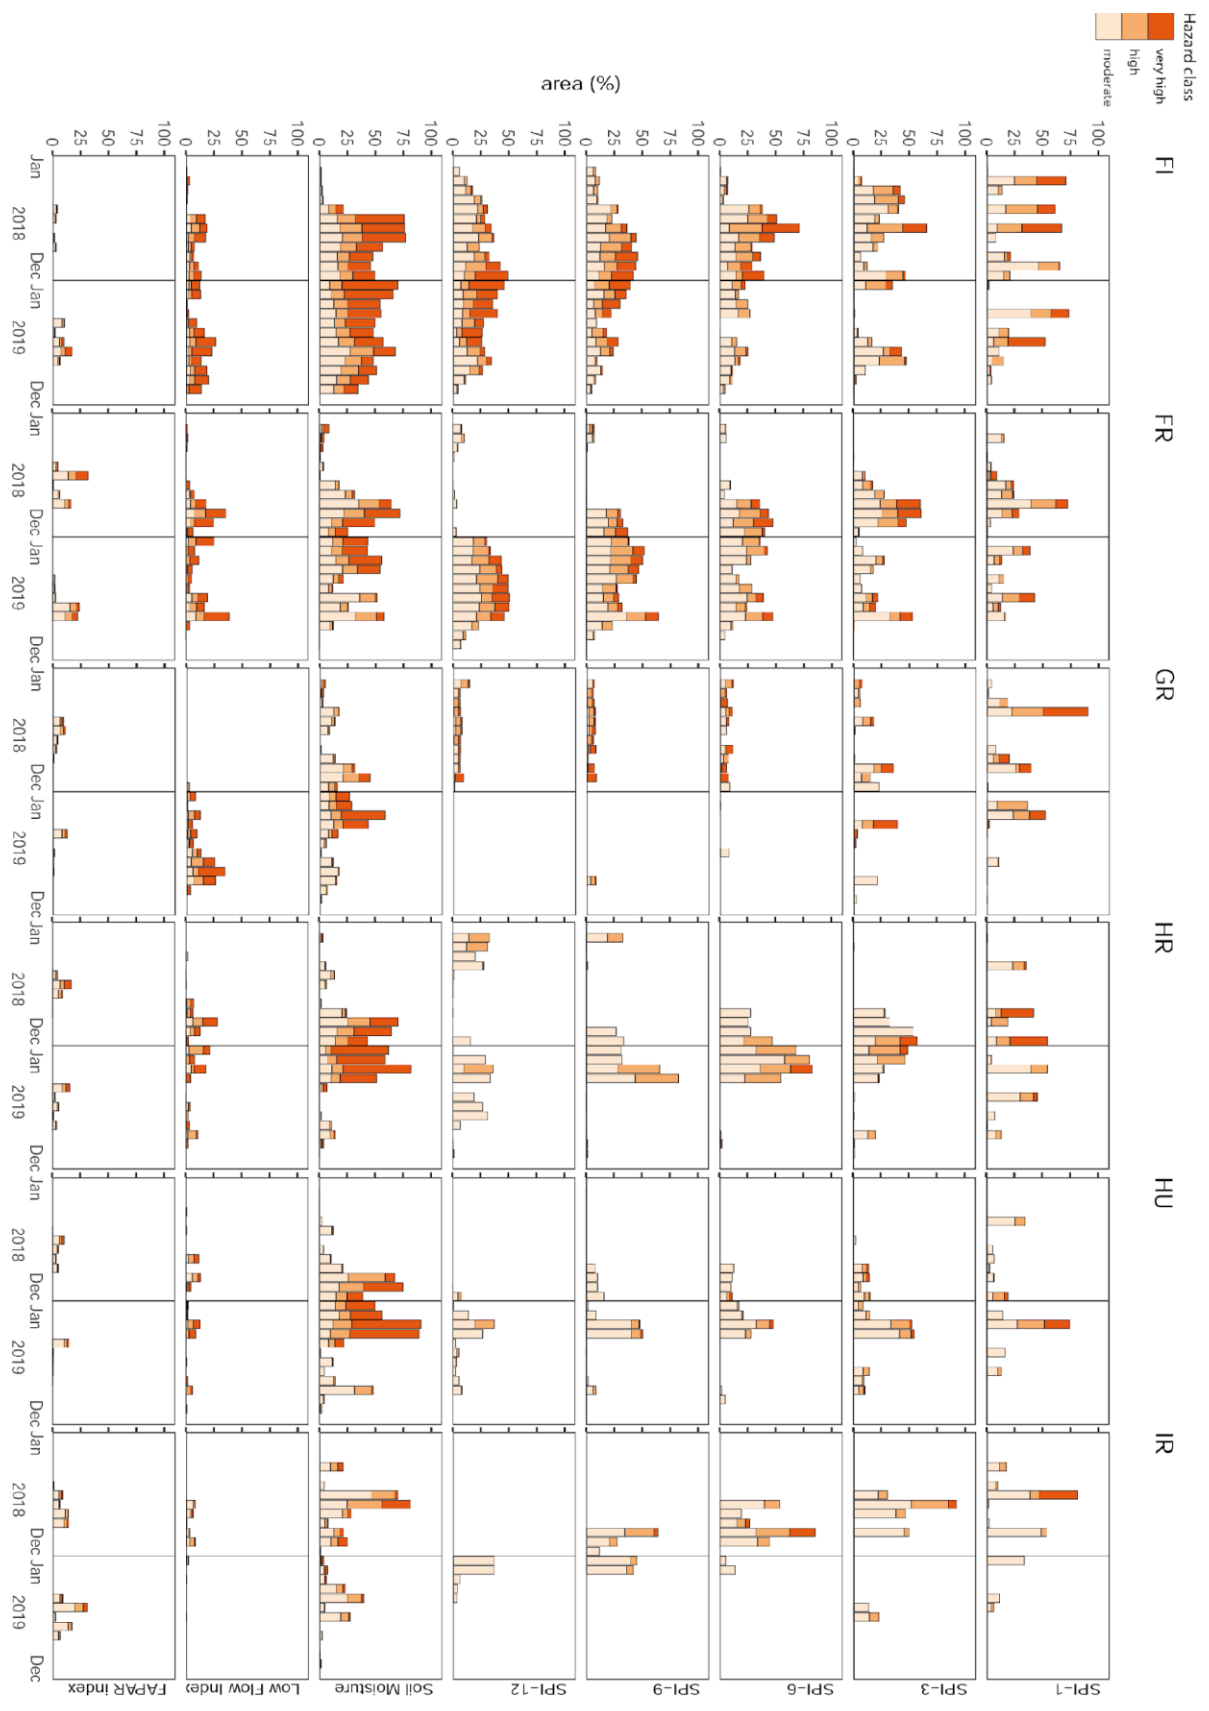

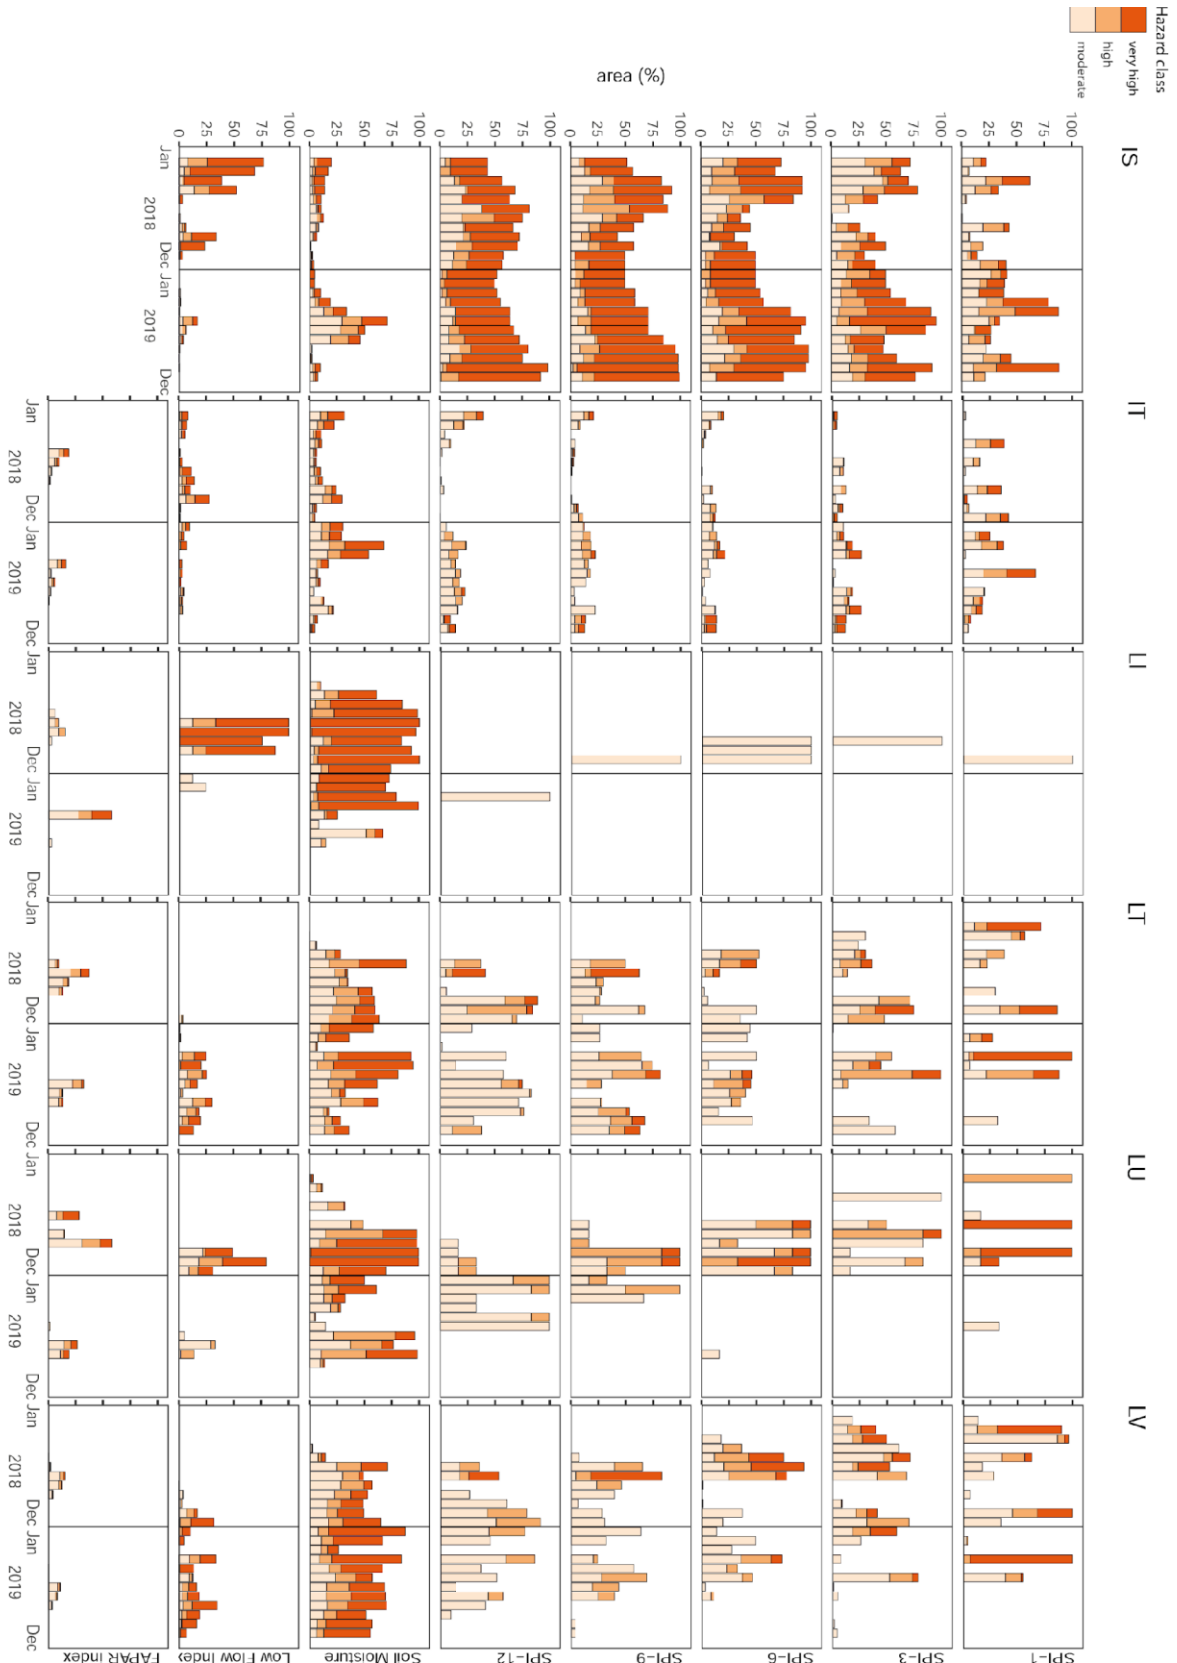

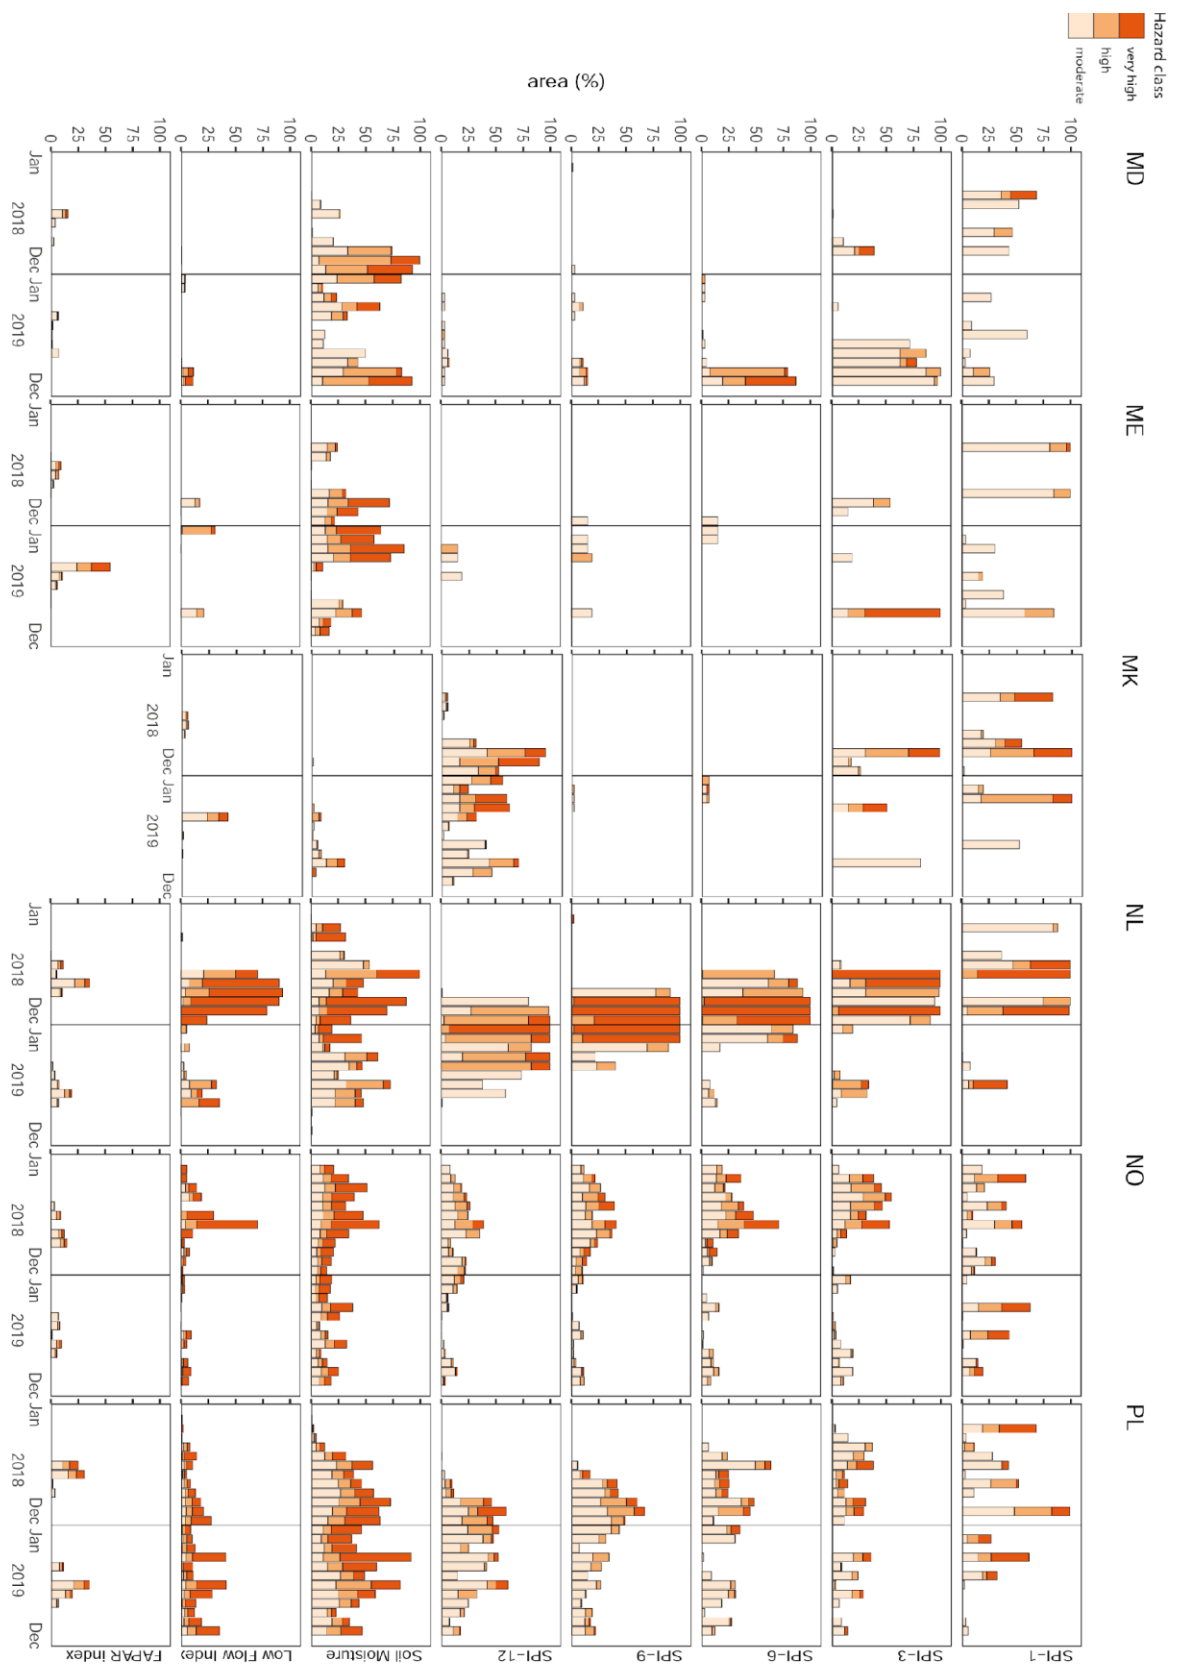

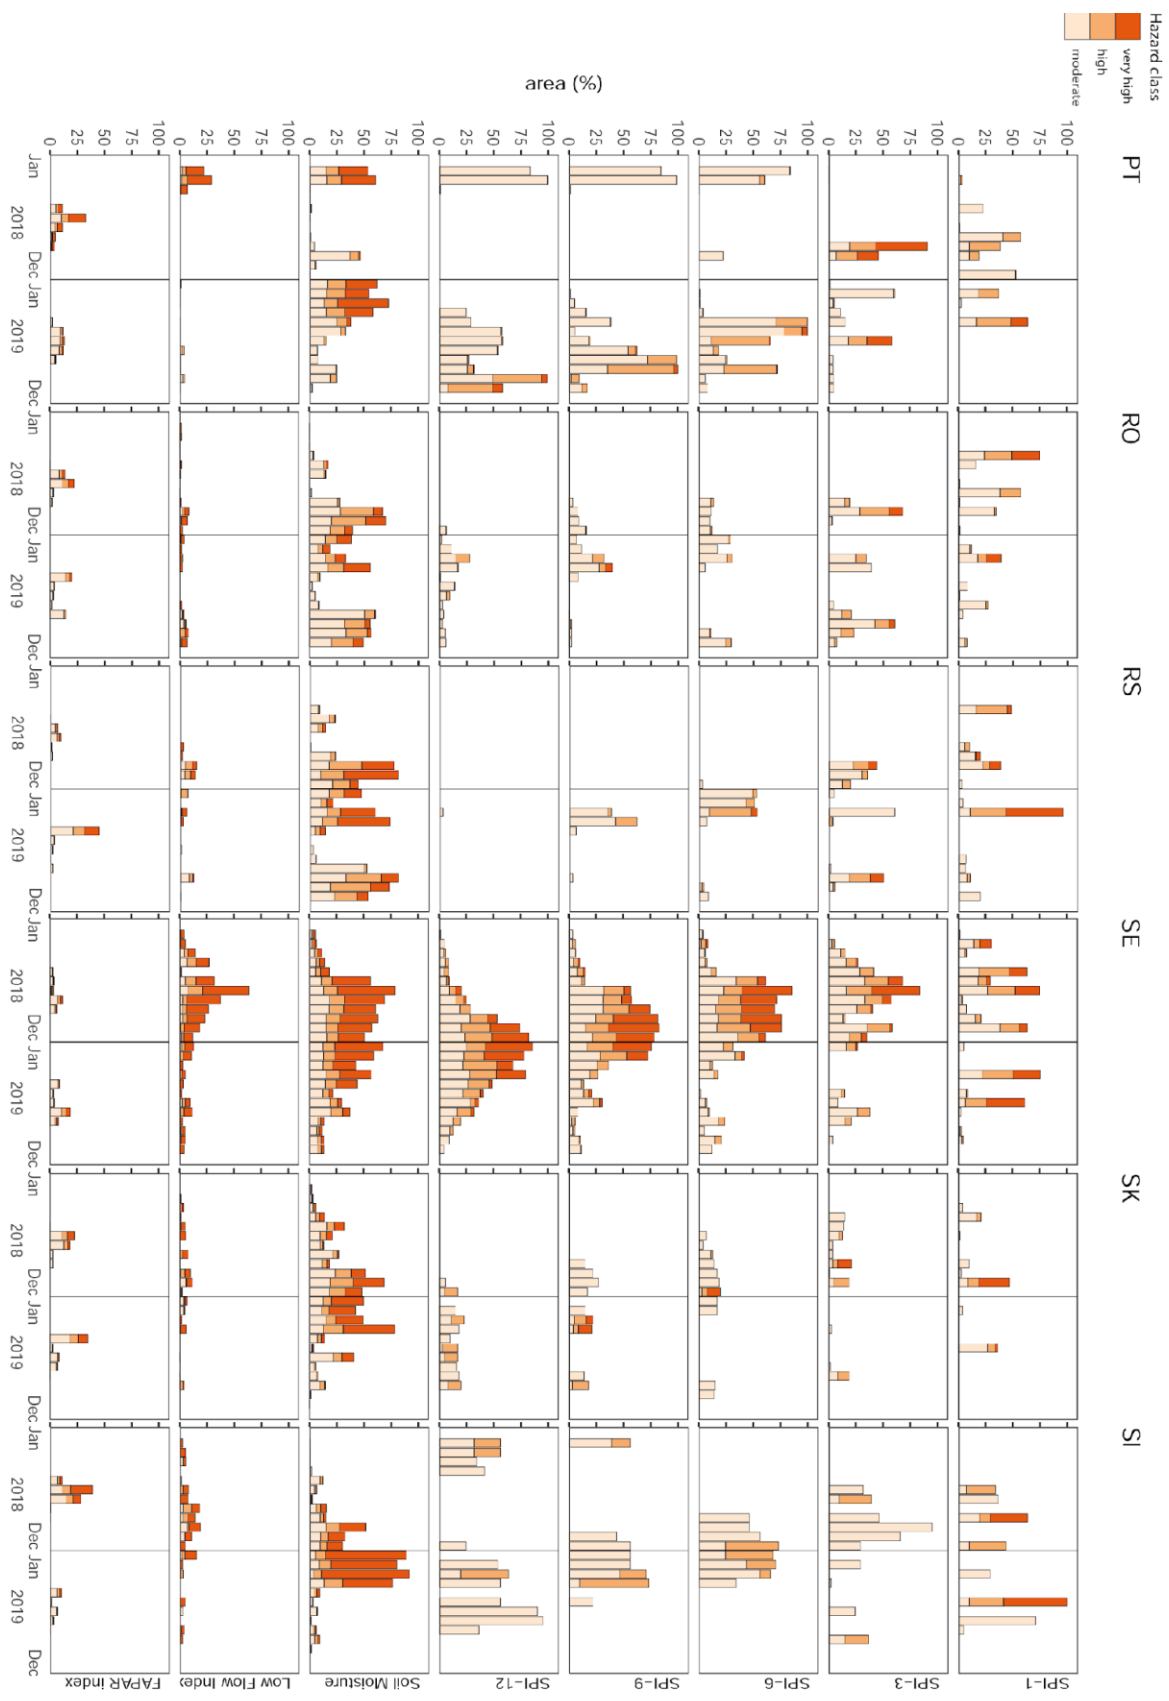



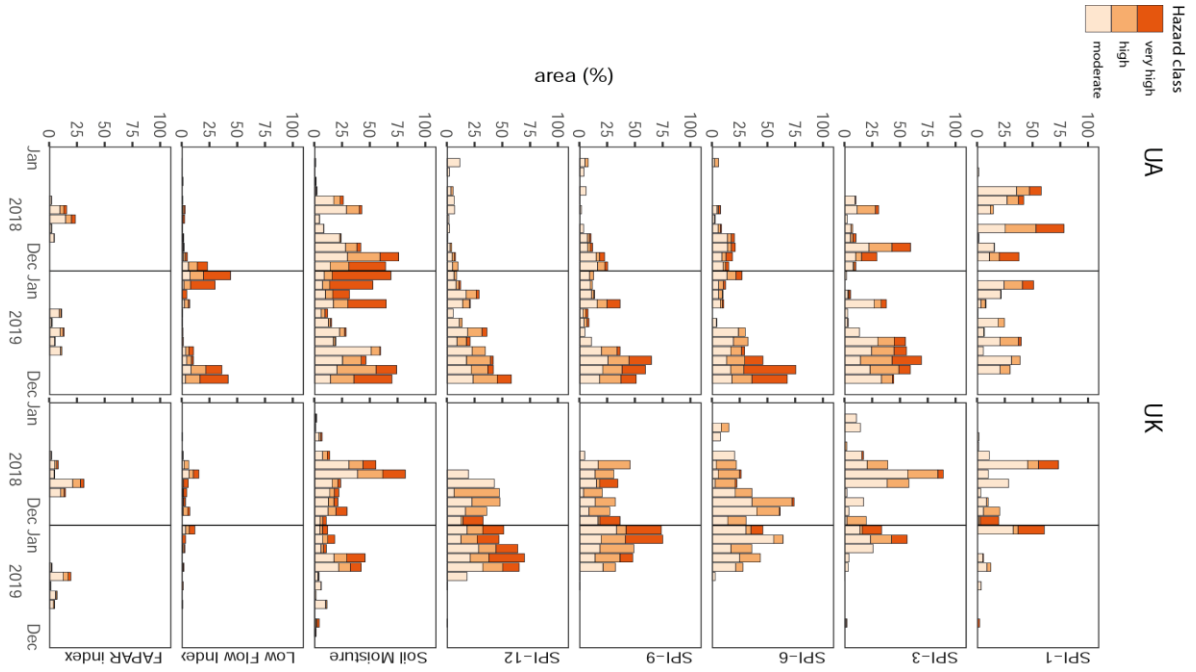

**Figure S1. Drought hazard conditions for 2018-2019 by country and different drought indices: SPI, Soil Moisture (Index), Low Flow Anomaly and fAPAR are monthly averages of three 10-day intervals**

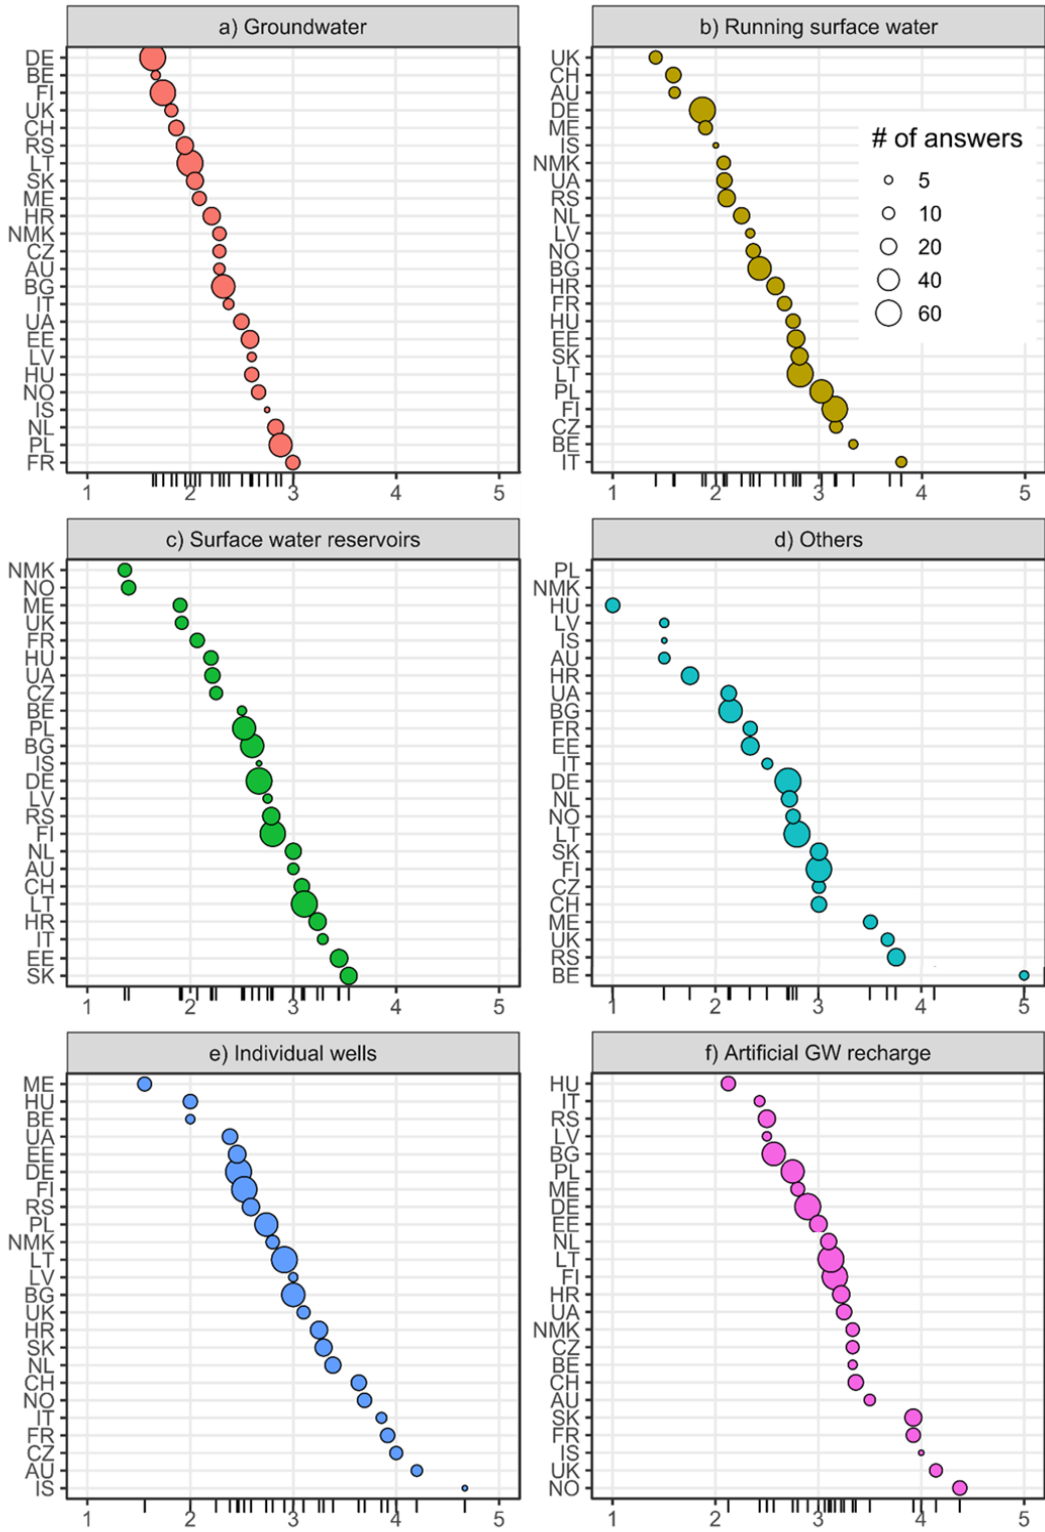

<-- more important    Mean ranking per country (-)    less important -->

Figure S2: Importance of water resources by country; ordered by importance, for the sake of comparability Spain is not included here

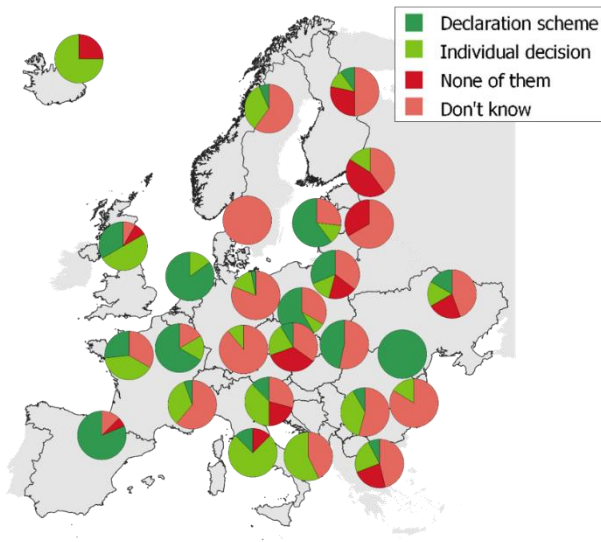

Figure S3: Existence of a country- or county wide drought declaration scheme

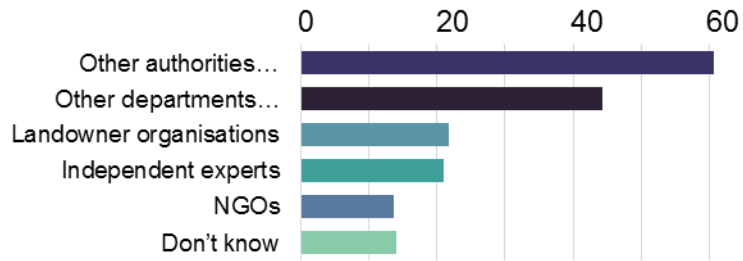

Figure S4: Overall percentage of participants that during drought collaborate with.

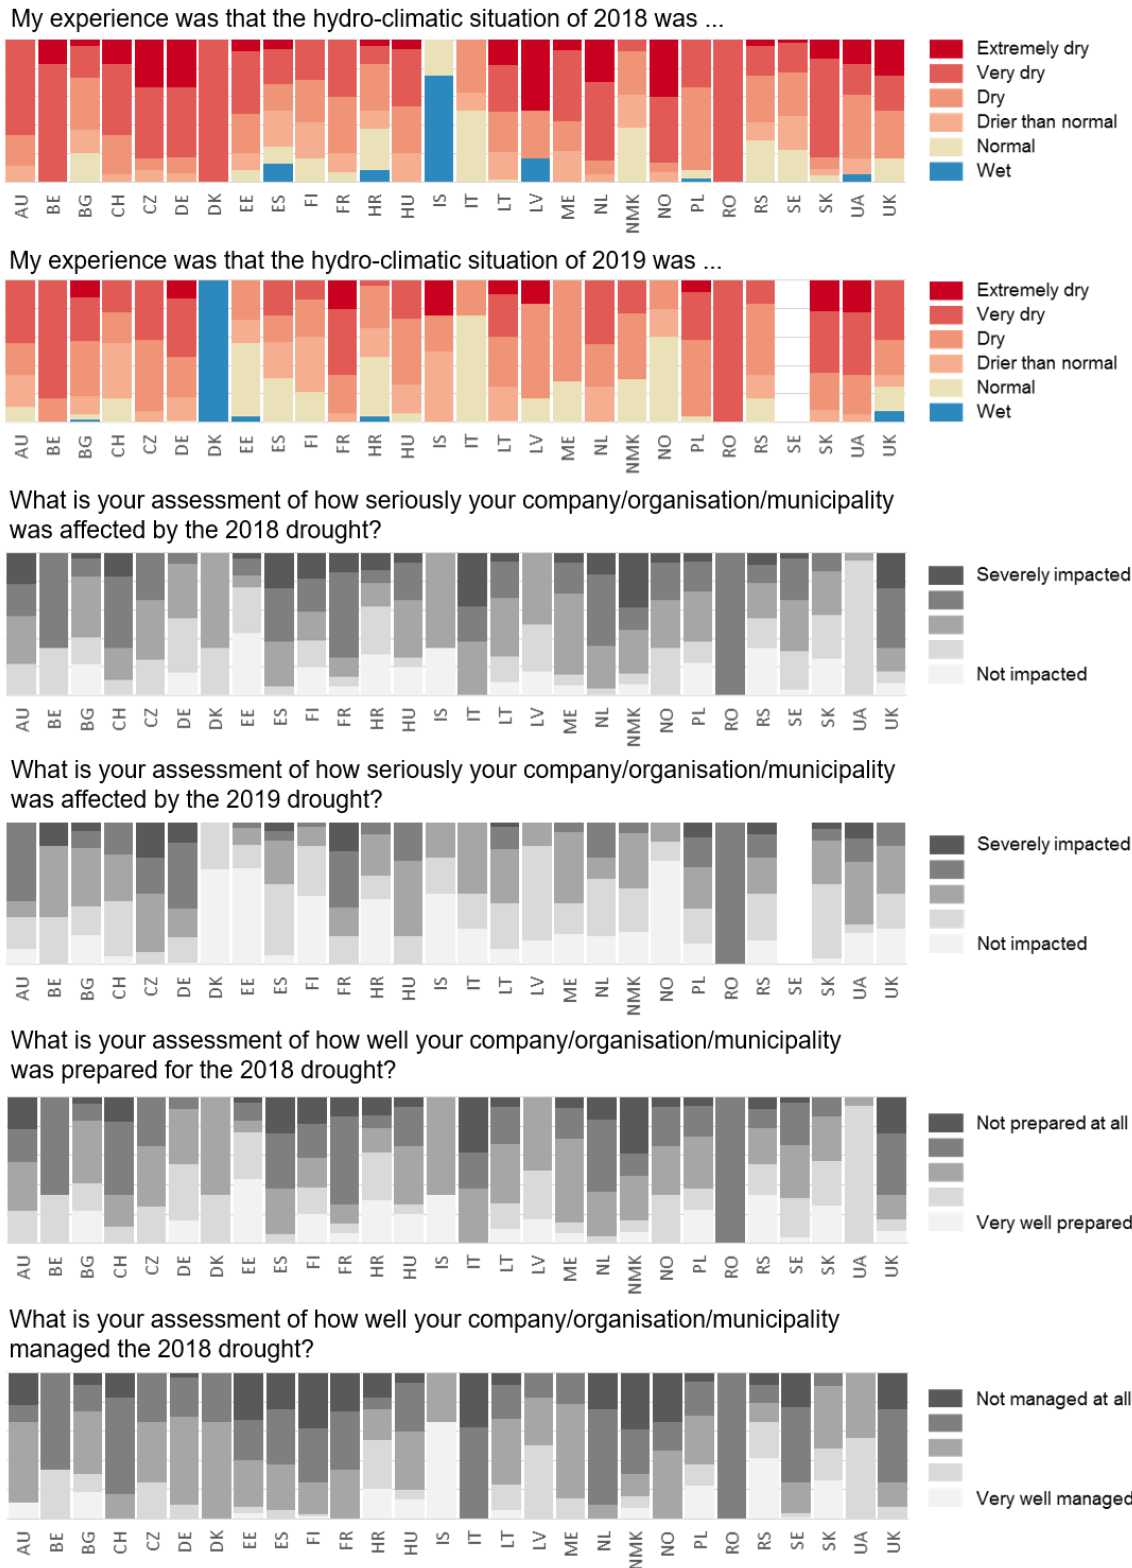

Figure S5: Country wise perception of the 2018 and 2019 drought events

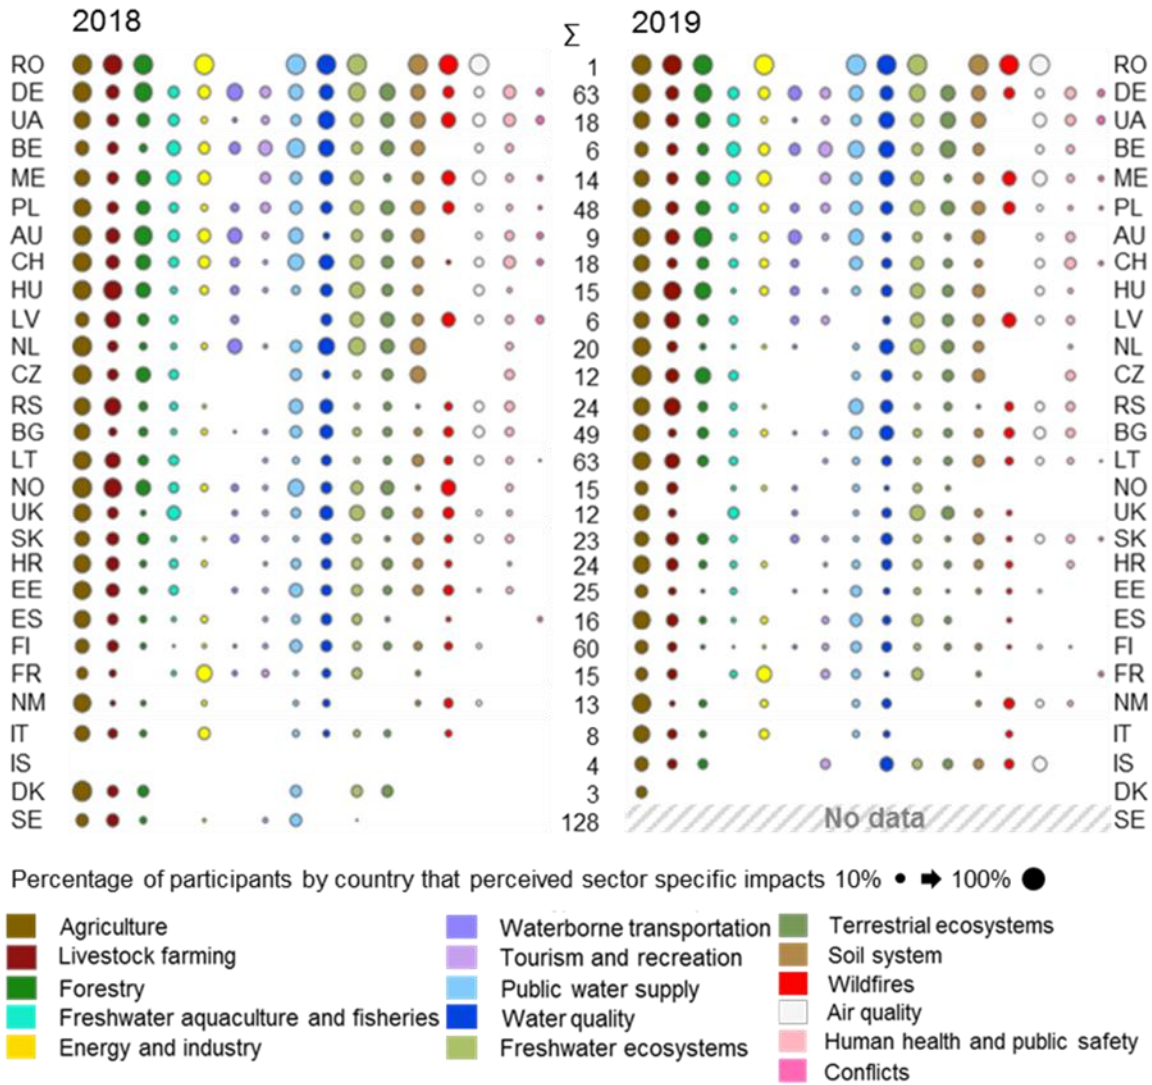

Figure S6: Percentage of participants that perceived drought impacts in their region by year and sector;  $\Sigma$  = number of participants by country, order by average percentage of impacts perceived.

**Table S1. Questions of the pan-European survey in English. For each participating country, the survey was translated to local language(s). For the majority of questions, the possibility for additional free text reply was provided.**

| ID       | Question                                                                                                                                                                   |
|----------|----------------------------------------------------------------------------------------------------------------------------------------------------------------------------|
| <b>B</b> | <b>Background</b>                                                                                                                                                          |
| B.0      | What kind of organisation do you belong to?                                                                                                                                |
| B.1      | In which country is your municipality/ company located                                                                                                                     |
| B.2      | Which municipality do you work in                                                                                                                                          |
| B.3      | What is the major business/ role of your organisation?                                                                                                                     |
| B.4      | What is your role in your organisation?                                                                                                                                    |
| B.5      | What type of main water resource do you have in your organisation/ municipality? Please rank your selections by importance (1 most important).                             |
| B.6      | Do you in your municipality/ company consider how future climate change may affect water resources?                                                                        |
| B.7      | We assume that the occurrence of droughts in the future will...                                                                                                            |
| B.8      | Do you think that water providers in the future will have to regulate the distribution of drinking water to different consumers due to water shortages?                    |
| <b>C</b> | <b>Applied concepts and terminology</b>                                                                                                                                    |
| C.1      | Do you in your municipality/ company have an operational drought definition? If so, which physical indicators is the definition based on?                                  |
| C.1.1    | Please specify the applied drought definition and physical drought indices.                                                                                                |
| 2        |                                                                                                                                                                            |
| C.2      | In your country or county, does a governmental, operational drought declaration system exist or is the declaration of drought situations based on case specific decisions? |
| <b>D</b> | <b>Drought management</b>                                                                                                                                                  |
| D.1      | In our work with droughts we collaborate with ... (multiple answers possible)                                                                                              |
| D.2      | With regard to drought risk management do you in your municipality/ company currently have a ...(please specify)                                                           |
| D.3      | Why is there no drought risk management plan? (multiple answers possible)                                                                                                  |
| D.4      | Do you have plans to introduce a drought risk management plan?                                                                                                             |
| <b>E</b> | <b>2018</b>                                                                                                                                                                |
| E.1      | My experience was that the hydro-climatic situation of 2018 was ...                                                                                                        |
| E.2      | What is your assessment of how well your organization/municipality managed the 2018 drought?                                                                               |
| E.3      | What is your assessment of how well your organization/municipality was prepared for the 2018 drought?                                                                      |
| E.4      | What is your assessment of how seriously your organization/municipality was affected by the 2018 drought?                                                                  |
| E.5      | Which sectors / services / businesses were negatively affected in your municipality by the drought during 2018? (multiple answers possible)                                |
| <b>F</b> | <b>2019</b>                                                                                                                                                                |
| F.1      | My experience was that the hydro-climatic situation of 2019 was ...                                                                                                        |
| F.2      | Did your organisation/municipality manage the 2019 drought better than the year before?                                                                                    |
| F.3      | Was your municipality/ organisation prepared better than 2018?                                                                                                             |
| F.4      | What is your assessment of how seriously your organization/municipality was affected by the 2019 drought?                                                                  |
| F.5      | Did the preceding drought of 2018 play a crucial role for the impacts of 2019?                                                                                             |
| F.6      | Which sectors / services / businesses were negatively affected in your municipality by the drought during 2019?                                                            |

**Table S 2, Number and share of participants by affiliation and country.**

| Country | Govern.<br>authority | NGO/<br>charity | Private<br>company | Public<br>company | Scientific<br>institution | Other... | Total |
|---------|----------------------|-----------------|--------------------|-------------------|---------------------------|----------|-------|
| AU      | 56%                  |                 | 22%                |                   | 22%                       |          | 9     |
| BE      | 67%                  |                 |                    |                   |                           | 33%      | 6     |
| BG      | 57%                  |                 | 37%                |                   |                           | 2%       | 49    |
| CH      | 94%                  |                 |                    |                   |                           | 6%       | 18    |
| CZ      | 25%                  | 17%             | 50%                |                   |                           | 8%       | 12    |
| DE      | 95%                  | 2%              | 3%                 |                   |                           |          | 63    |
| DK      | 100%                 |                 |                    |                   |                           |          | 3     |
| EE      | 68%                  | 12%             | 4%                 |                   |                           | 16%      | 25    |
| ES      | 69%                  |                 | 13%                |                   |                           | 19%      | 16    |
| FI      | 87%                  | 2%              | 12%                |                   |                           |          | 60    |
| FR      | 27%                  |                 | 73%                |                   |                           |          | 15    |
| HR      | 46%                  | 13%             | 8%                 | 4%                | 17%                       | 13%      | 24    |
| HU      | 40%                  |                 | 47%                |                   | 13%                       |          | 15    |
| IS      | 25%                  | 25%             |                    |                   | 50%                       |          | 4     |
| IT      | 63%                  |                 | 13%                |                   |                           | 25%      | 8     |
| LT      | 95%                  |                 |                    |                   |                           | 5%       | 63    |
| LV      | 50%                  | 33%             |                    |                   |                           | 17%      | 6     |
| ME      | 79%                  |                 |                    |                   | 7%                        | 14%      | 14    |
| NL      | 85%                  |                 | 10%                |                   |                           | 5%       | 20    |
| NMK     | 69%                  |                 | 15%                |                   |                           | 15%      | 13    |
| NO      | 87%                  |                 | 13%                |                   |                           |          | 15    |
| PL      | 56%                  |                 | 4%                 |                   | 4%                        | 35%      | 48    |
| RO      | 100%                 |                 |                    |                   |                           |          | 1     |
| RS      | 63%                  | 4%              | 25%                |                   | 8%                        |          | 24    |
| SE      | 100%                 |                 |                    |                   |                           |          | 128   |
| SK      | 30%                  | 26%             | 43%                |                   |                           |          | 23    |
| UA      | 22%                  | 33%             | 17%                |                   | 28%                       |          | 18    |
| UK      | 58%                  | 8%              | 33%                |                   |                           |          | 12    |
| Sum     | 74%                  | 4%              | 13%                | 0%                | 3%                        | 6%       | 712   |
